# Supplementary material for: Aryldiazonium-grafted bamboo-derived activated carbon: a solid acid catalyst with stable C–C bonded sulfonic acid sites for biodiesel production via esterification
Source: Royal Society of Chemistry journal article supplement (doi:10.1039/d5ra10105k), 2026-03-24
Supplement: d5ra10105k1.pdf [file d5ra10105k1.pdf]

## Supplementary Data

### **Aryldiazonium-Grafted Bamboo-Derived Activated Carbon: A Solid Acid Catalyst with Stable C–C Bonded Sulfonic Acid Sites for Biodiesel Production via Esterification**

Xiaona Wang<sup>a</sup>, Bingxin Zhang<sup>b\*</sup>, Zilin Hu<sup>b</sup>, Pan Zhao<sup>c</sup>, Qunhui Wang<sup>a</sup>

<sup>a</sup> Department of Environmental Science and Engineering, School of Energy and Environmental Engineering, University of Science and Technology Beijing, 30 Xueyuan Road, Haidian District, Beijing 100083, China

<sup>b</sup> China Coal Research Institute Co. Ltd, Beijing 100013, China

<sup>c</sup> Department of Environmental Engineering, Tianjin College, University of Science and Technology Beijing, Tianjin 301830, China

\* Correspondence to: Bingxin Zhang, China Coal Research Institute Co. Ltd, Beijing 100013, China, TEL/FAX: +86-18401619821, Email: [18401619821@163.com](mailto:18401619821@163.com)

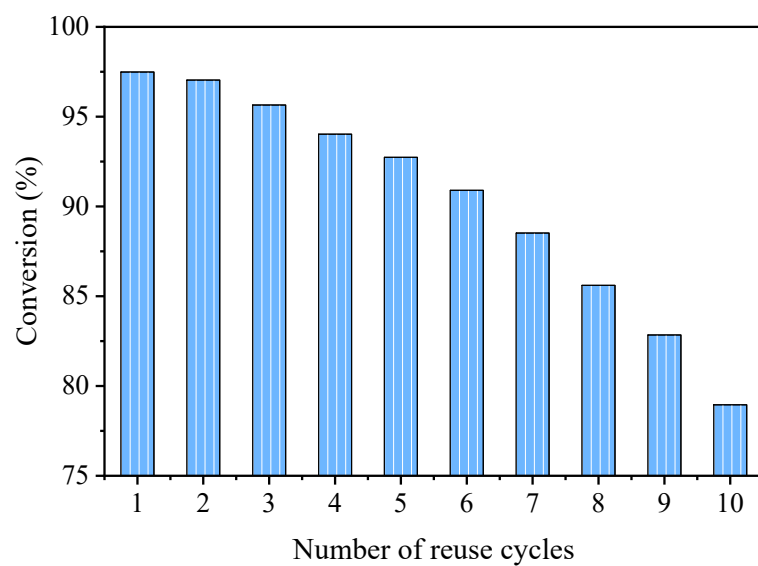

**Fig. S1** Reusability of ACC600 in esterification of oleic acid at a low catalyst loading of 2 wt% (reaction conditions: methanol/oil molar ratio 6:1, 75°C, 6 h).

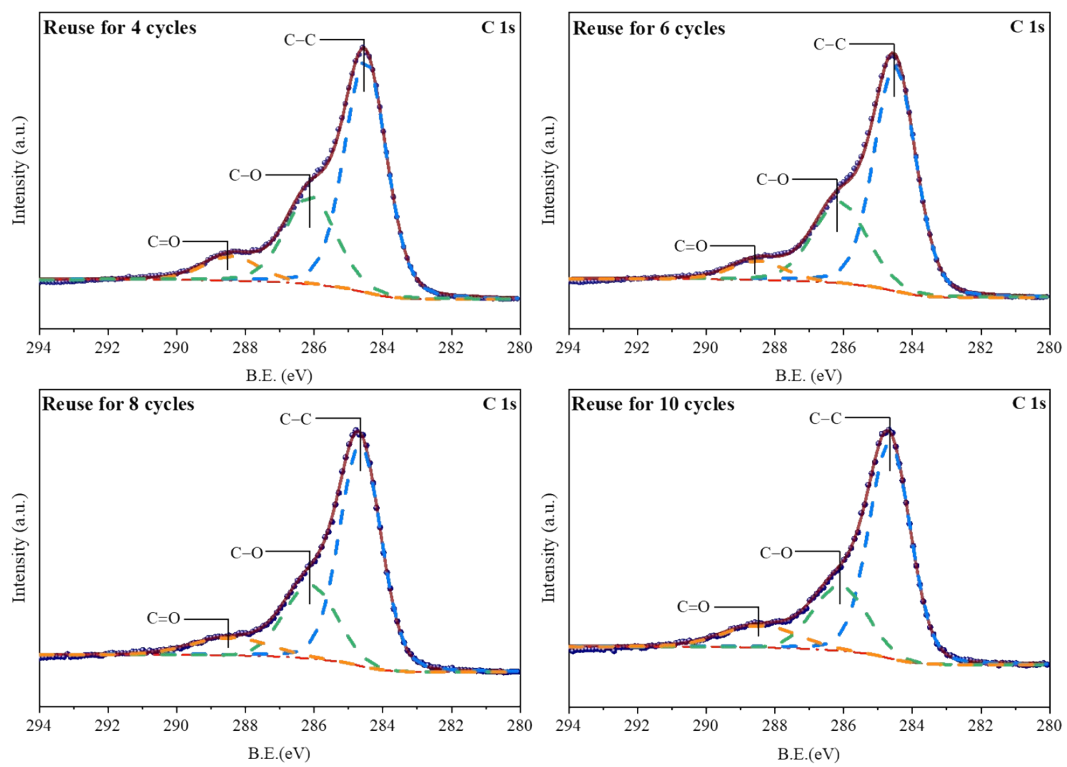

**Fig. S2** C 1s XPS spectra of ACC600 throughout the repeated catalytic esterification of oleic acid and methanol.
